# Supplementary material for: Ursolic acid reverses liver fibrosis by inhibiting interactive NOX4/ROS and RhoA/ROCK1 signalling pathways
Source: publisher site journal article supplement (doi:10.18632/aging.103282), 2020-06-03
Supplement: Supplementary file [file aging-v12i11-103282-supplementary-material-SD1.pdf]

## SUPPLEMENTARY FIGURES

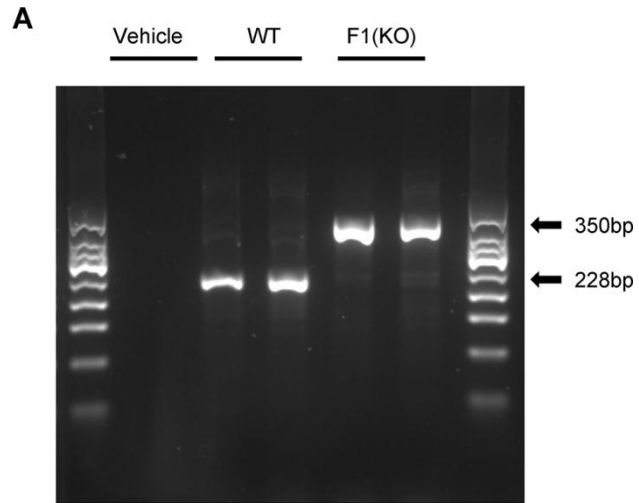

**Supplementary Figure 1. NOX4<sup>-/-</sup> mouse genotype identification.** (A) NOX4 DNA was validated by agarose gel electrophoresis. WT: wild-type mice; F1: B6.129-NOX4tm1Kkr/J mouse progeny; vehicle: DNA was replaced with water, negative control group.

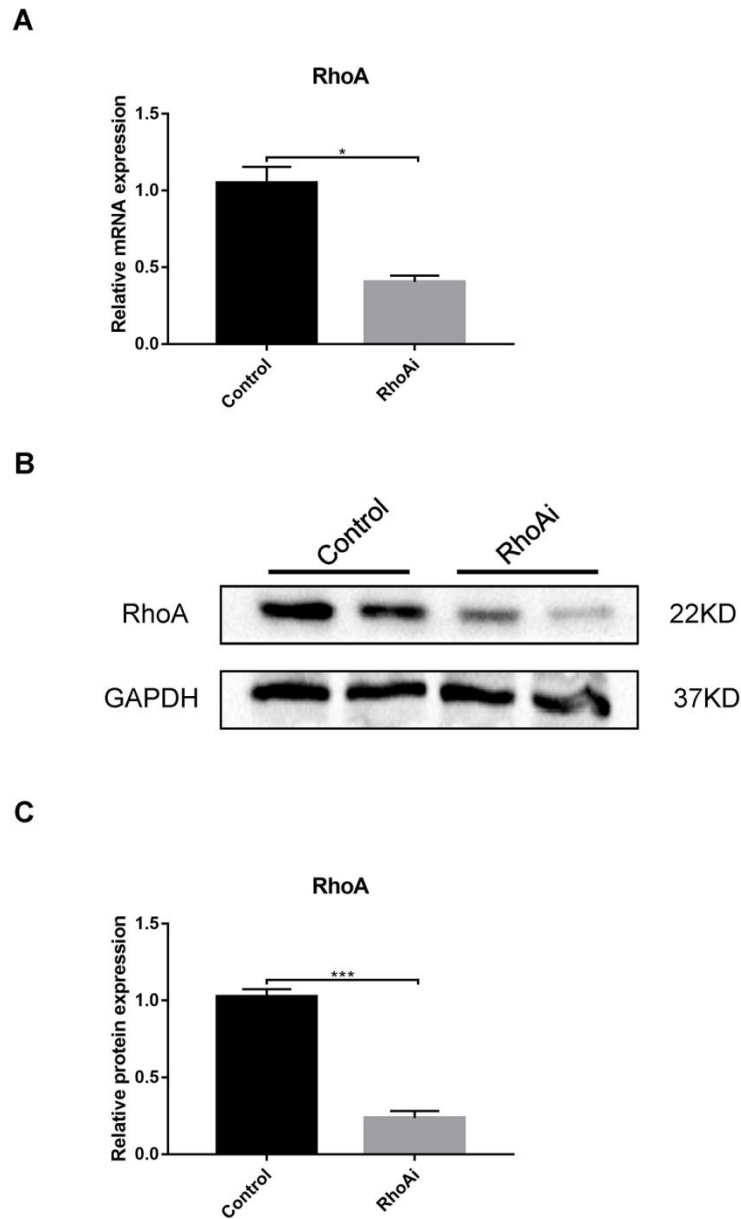

**Supplementary Figure 2. Validation of RhoA expression inhibition in the mouse model.** (A) Hepatic mRNA levels of RhoA were measured by qRT-PCR. (B) RhoA protein expression was detected by a western blot. (C) Histogram analysis of the levels of RhoA. Data represent the mean  $\pm$  SD of each group. \* $P < 0.05$  and \*\*\* $P < 0.001$ .
